# Supplementary material for: Enhanced solid-state electron transport via tryptophan containing peptide networks
Source: Royal Society of Chemistry journal article supplement (doi:10.1039/c3cp51748a), 2013-01-01
Supplement: c3cp51748a.pdf [file c3cp51748a.pdf]

Supplementary Information for

## Enhanced solid-state electron transport via tryptophan containing peptide networks

Nadav Amdursky<sup>\*a</sup>

*Departments of Materials and Interfaces and Organic Chemistry, Weizmann Institute of Science, Rehovot, Israel.*

*Fax: +972-8-9344138;*

*Tel: +972-8-9343115;*

*E-mail: Amdursky@weizmann.ac.il*

### Materials and Methods

**PND preparation and deposition** – Both the preparation and deposition of the PND were conducted in a low humidity environment (chemical glovebox). FF and FW (Bachem) were dissolved in 1,1,1,3,3,3-hexafluoro-2-propanol at a concentration of 100 mg/ml, followed by a dilution with anhydrous MeOH to a final concentration of 2 mg/ml. ~10  $\mu$ l of the diluted solution was drop-casted and dried on top of a mica or Au surface. Prior to deposition on mica, the outer surface of the mica was peeled off with a scotch tape to expose a clean new surface. A Si wafer (p type, boron doped, <100> single side polished,  $\rho < 0.001 \Omega \cdot \text{cm}$ ) coated with 2 nm of Cr and 50 nm of Au was used for the deposition on the Au surface. Prior to the deposition on the Au surface, the Si coated wafer was cut to 1\*1  $\text{cm}^2$  slides, cleaned for 10 min with UV/ozone treatment followed by a 30 min immersion in hot ethanol.

**FF tubes preparation** – FF was dissolved in 1,1,1,3,3,3-hexafluoro-2-propanol at a concentration of 100 mg/ml, followed by a dilution with ddH<sub>2</sub>O to a final concentration of 2 mg/ml. Though the self-assembly process occurs within minutes, the solution was left on the bench for at least 2 h prior to deposition.

**Scanning electron microscopy measurements** - The FF tubes were deposited on Si/SiO<sub>x</sub> surface. The sample was coated with palladium–gold, and scanned using a JSM JEOL 6300 scanning electron microscope operating at 5-10 kV.

**AFM topography measurements** - The mica surface was probed by a Digital Instrument (DI) MultiMode<sup>TM</sup> NanoScope IV AFM, using a Mikromasch NSC15/Si<sub>3</sub>N<sub>4</sub> cantilever (resonant frequency  $f=325$  kHz, spring constant  $k=40$  N/m) in a tapping mode.

**CP-AFM measurements** – The Au surface was probed by a Solver P47 SPM system (ND-MDT, Zelenograd, Russia), using an all-metal Pt AFM probes with nominal force constant of 0.8 N/m (25PT300B, Rocky Mountain Nanotechnology) and a tip radius of 20 nm in a contact mode.

**UV-Vis absorption** – The UV-Vis absorption measurements were taken with a Cary 5000 UV-Vis-NIR Spectrophotometer, using a 0.1 cm quartz cuvette.

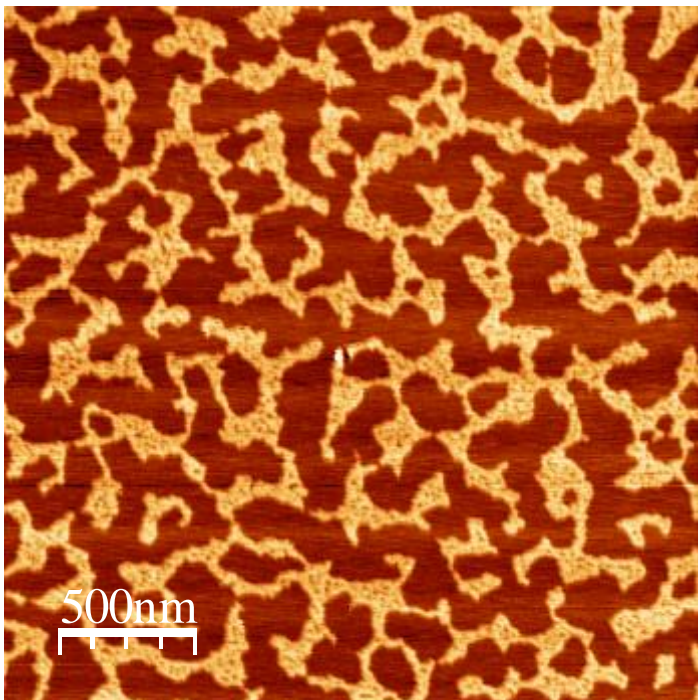

**Figure S1.** The morphology of a PND network composed of FW peptide.

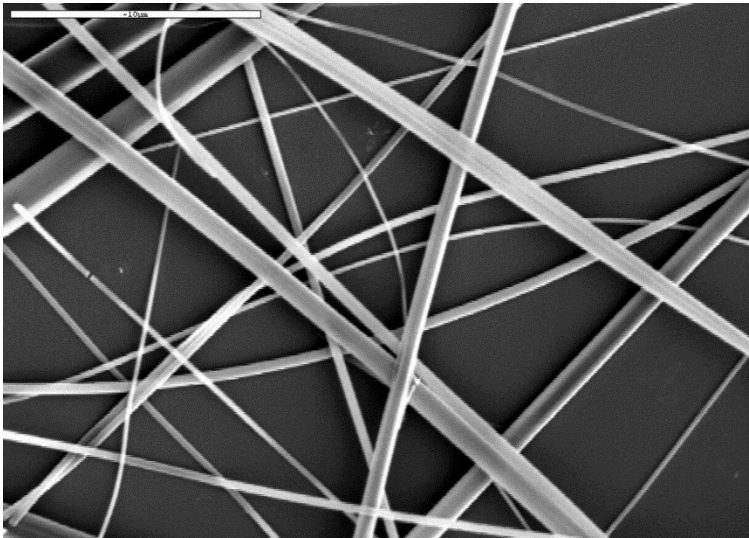

**Figure S2.** SEM image of FF tube formation.

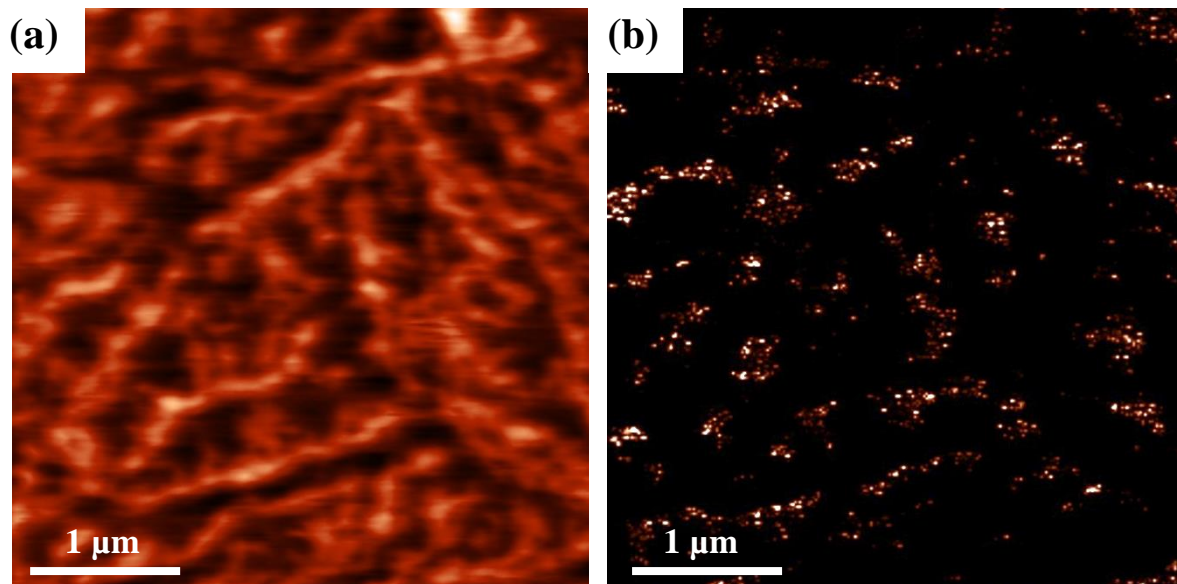

**Figure S3.** (a) The morphology and (b) the corresponded current map (tip bias=0.3V) of the FW PND network

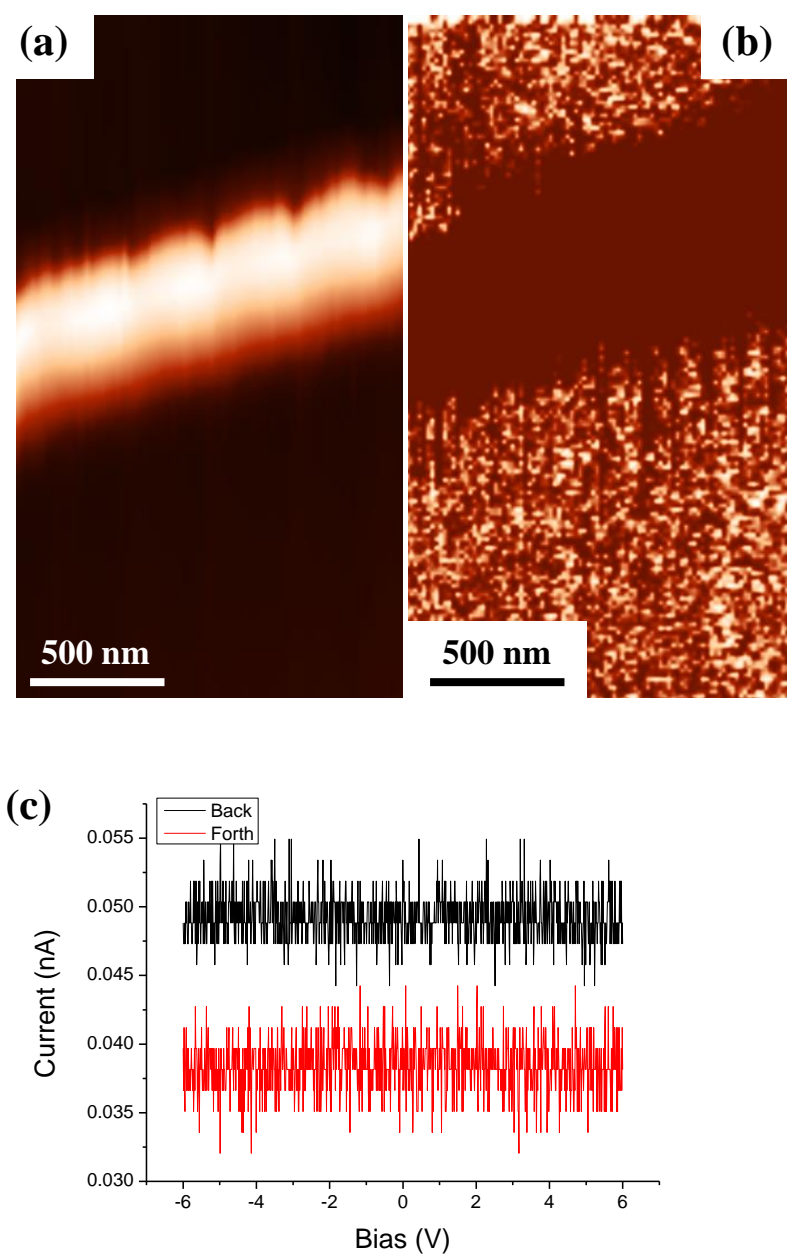

**Figure S4.** (a) Morphology, (b) current map and (c) single I-V of FF tube. The z-scales of (a) is 250 nm and (b) is 14 nA.

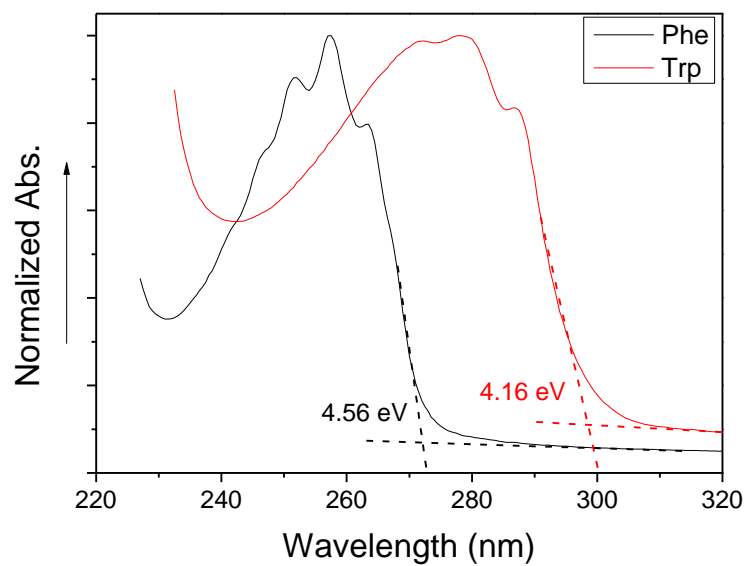

**Figure S5.** Normalized UV-Vis absorption spectrum of Phe and Trp in ddH<sub>2</sub>O. The optical band-gap is illustrated.
